# Supplementary material for: Phytochemical content, cellular antioxidant activity and antiproliferative activity of Adinandra nitida tea (Shiyacha) infusion subjected to in vitro gastrointestinal digestion
Source: Royal Society of Chemistry journal article supplement (doi:10.1039/c7ra07429h), 2017-01-01

### EGC+(tea)

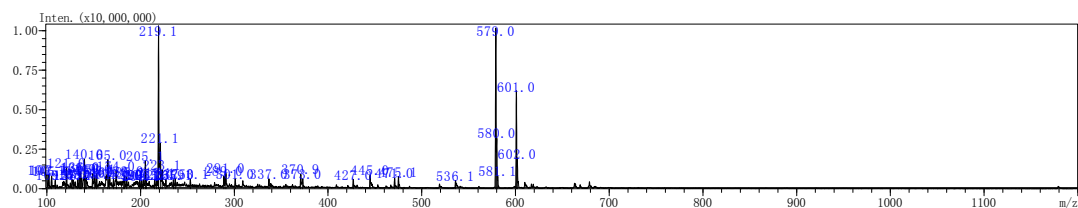

### EGC-(tea)

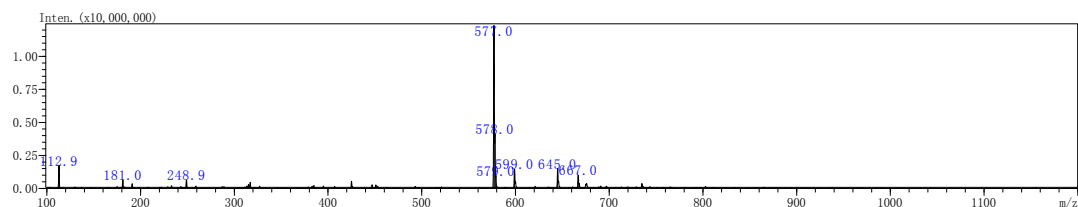

### EC+(tea)

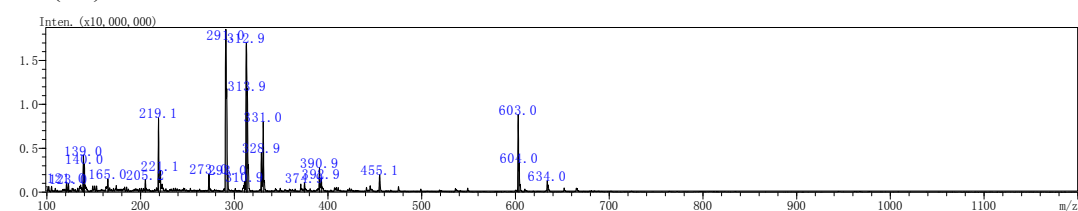

### EC-(tea)

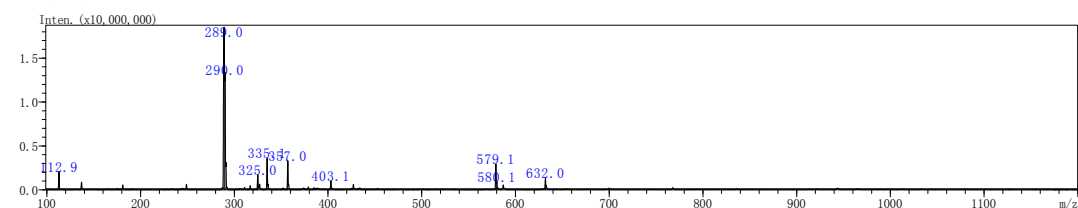

### Camellianin-B+(tea)

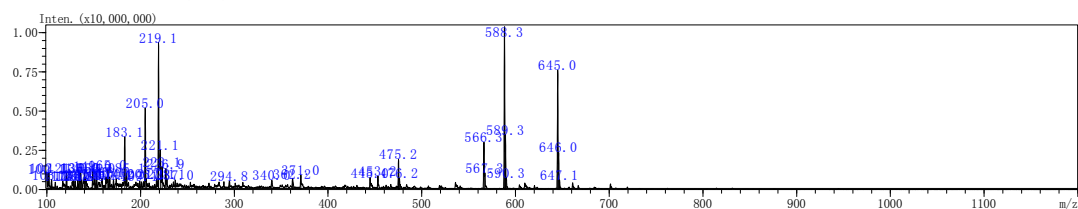

### Camellianin -B-( tea)

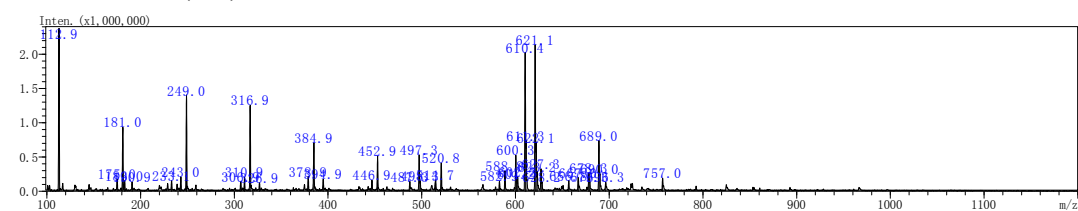

### Quercitrin+( tea)

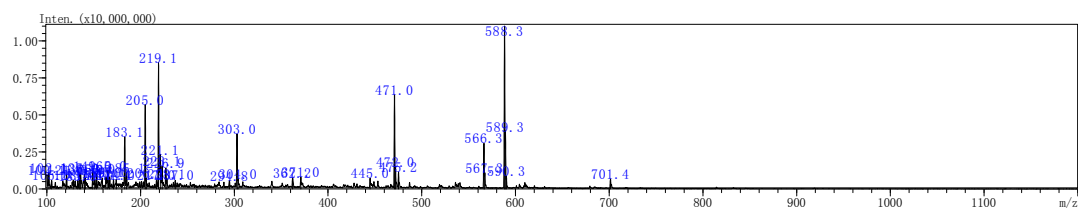

### Quercitrin -( tea)

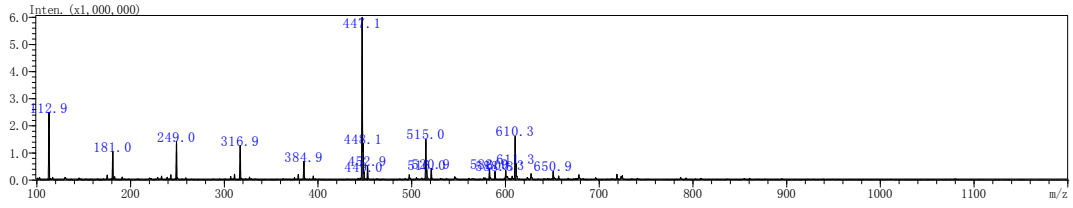

Camellianin -A+( tea)

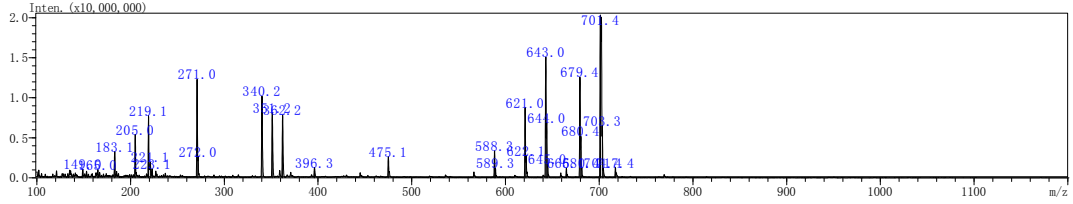

Camellianin -A-( tea)

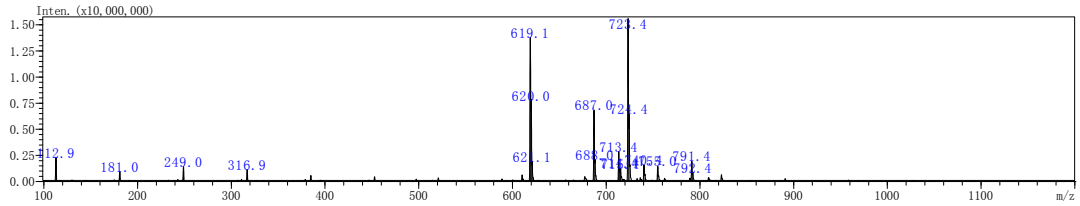

EGC+(gastric fluid)

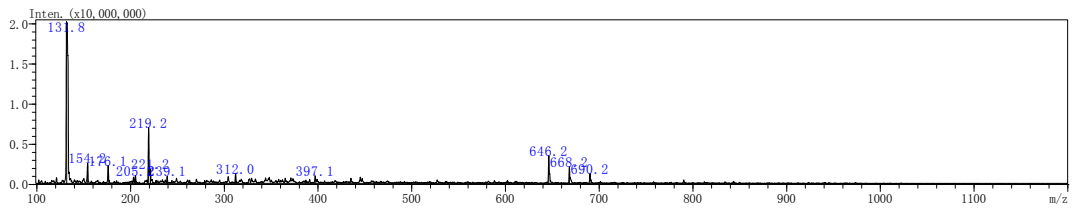

EGC-( gastric fluid)

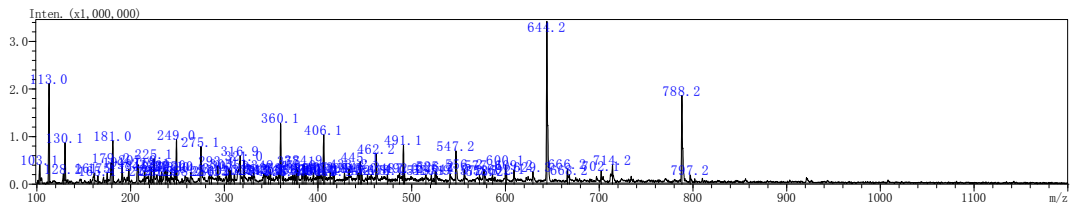

EC+( gastric fluid)

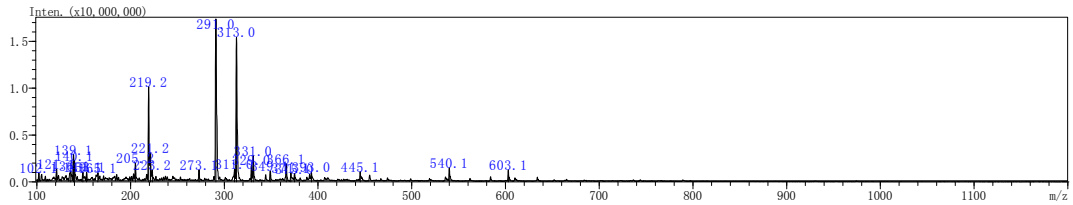

EC-( gastric fluid)

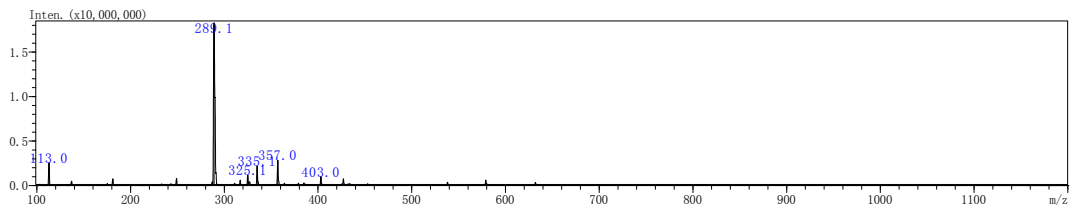

Camellianin -B+( gastric fluid)

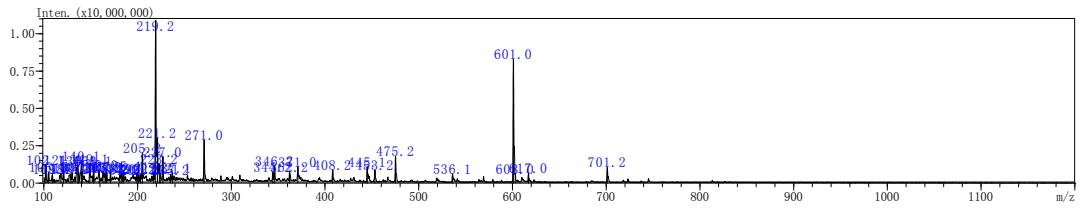

Camellianin -B-( gastric fluid)

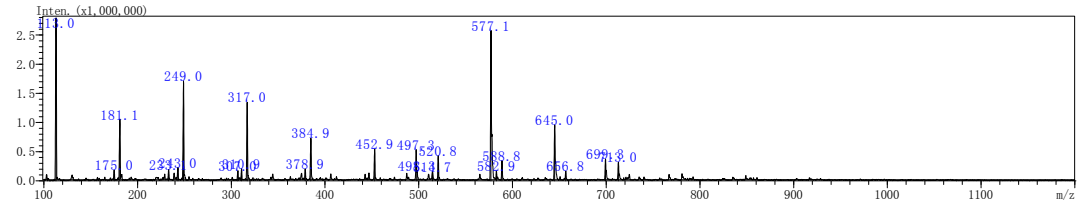

Quercitrin +( gastric fluid)

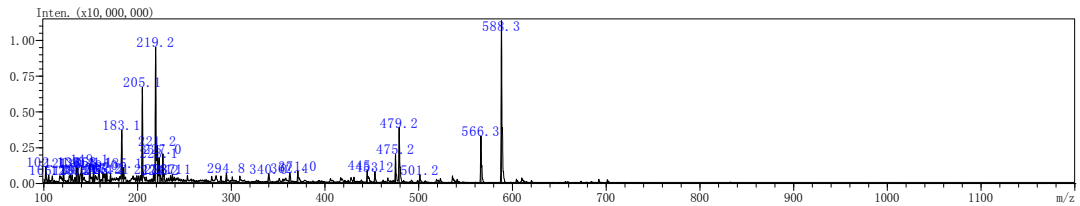

Quercitrin -( gastric fluid)

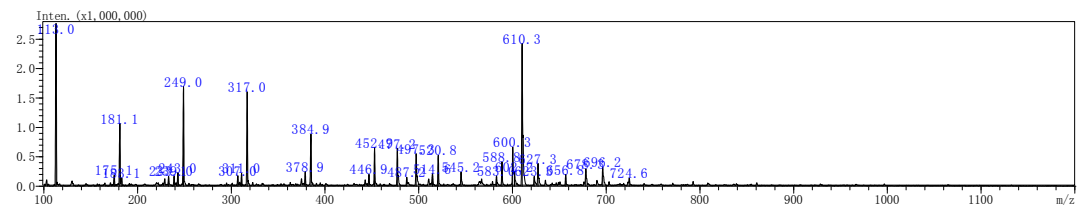

Camellianin -A+( gastric fluid)

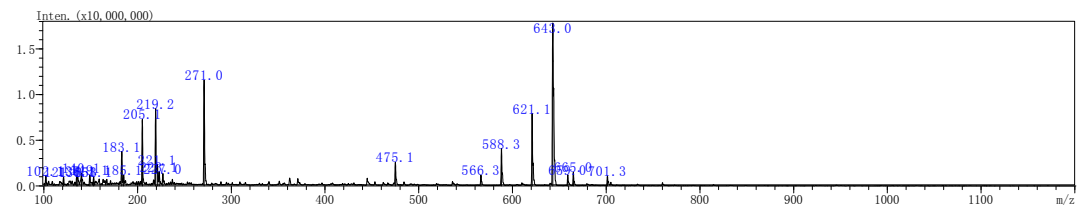

Camellianin -A-( gastric fluid)

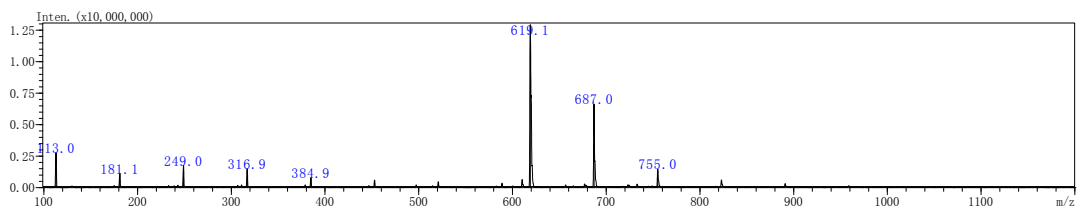

EGC+(intestinal fluid)

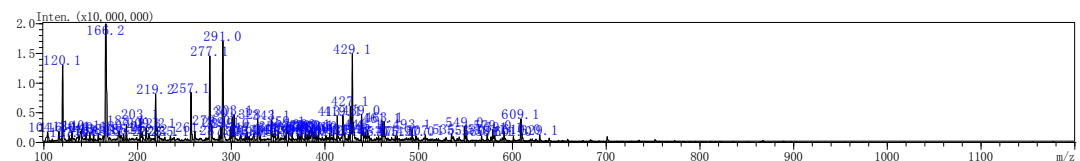

EGC-( intestinal fluid)

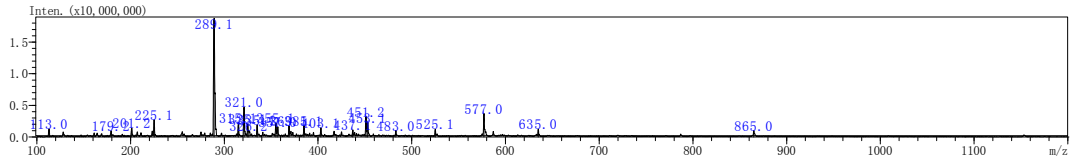

EC+(intestinal fluid)

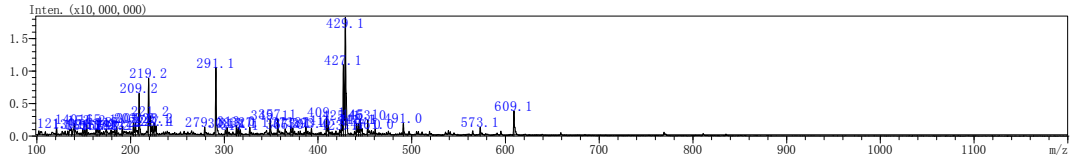

EC-(intestinal fluid)

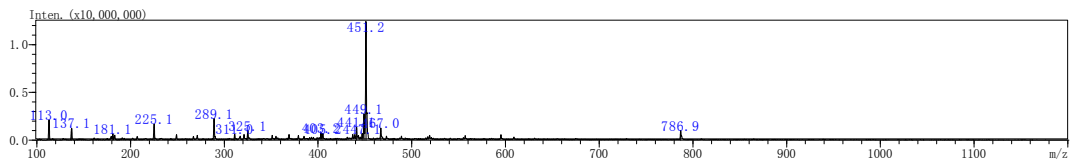

Camellianin -B+(intestinal fluid)

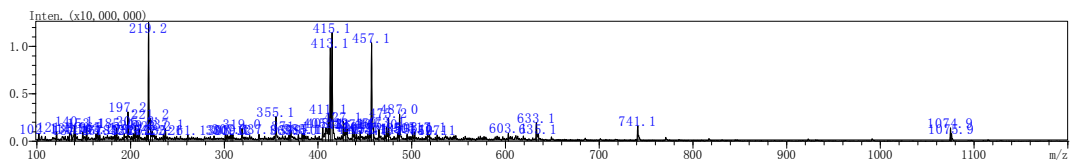

Camellianin -B-(intestinal fluid)

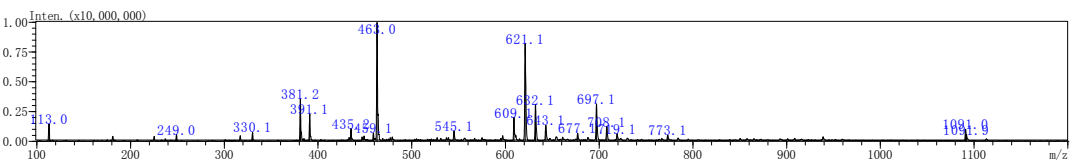

Quercitrin +(intestinal fluid)

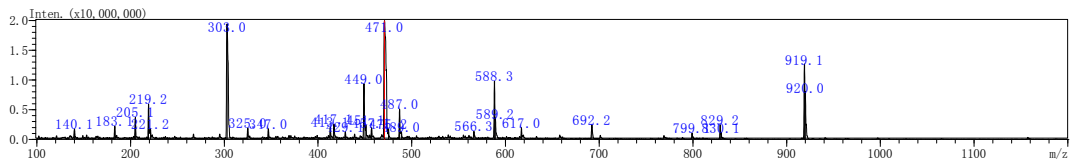

Quercitrin -(intestinal fluid)

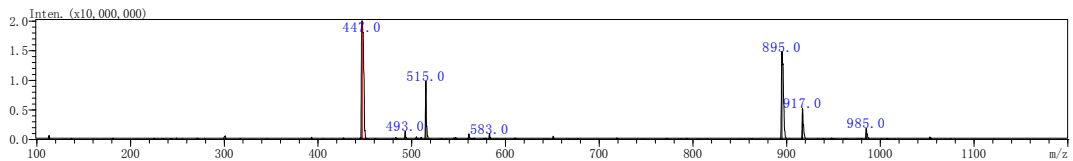

Camellianin -A+(intestinal fluid)

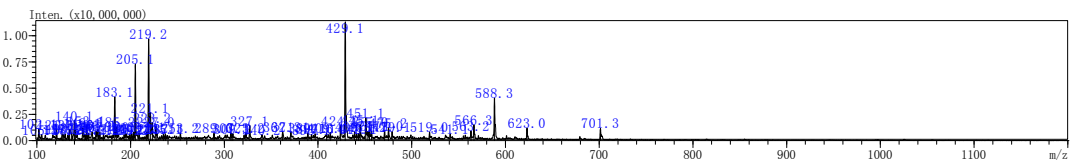

Camellianin -A-(intestinal fluid)

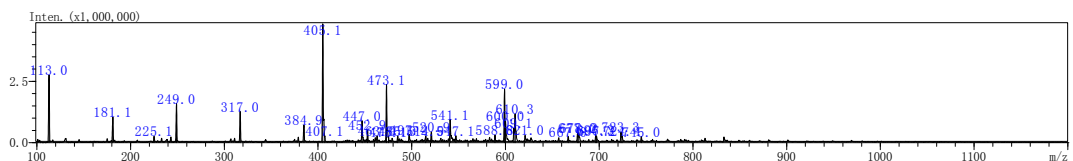

Supplement: c7ra07429h1.pdf [file c7ra07429h1.pdf]
